# Supplementary material for: MET18 Connects the Cytosolic Iron-Sulfur Cluster Assembly Pathway to Active DNA Demethylation in Arabidopsis
Source: PubMed Central journal article supplement (PMC4619598; doi:10.1371/journal.pgen.1005559), 2015-10-22
Supplement: pgen.1005559.s003.pdf [file pgen.1005559.s003.pdf]

# Figure S3

| <b>Sample</b>        | <b>Raw Reads</b> | <b>Uniquely Mapped Reads</b> | <b>reads after remove duplicate</b> | <b>average coverage per C</b> | <b>conversion rate</b> |
|----------------------|------------------|------------------------------|-------------------------------------|-------------------------------|------------------------|
| <i>met18-1</i> rep.1 | 64389274         | 45656340                     | 30393943                            | 11.437                        | 99.92%                 |
| <i>met18-1</i> rep.2 | 70426848         | 51560399                     | 33743130                            | 12.669                        | 99.93%                 |
| <i>met18-2</i> rep.1 | 84342152         | 64120473                     | 43675810                            | 16.837                        | 99.92%                 |
| <i>met18-2</i> rep.2 | 36243520         | 27484224                     | 19844373                            | 7.346                         | 99.97%                 |
