# Supplementary material for: MET18 Connects the Cytosolic Iron-Sulfur Cluster Assembly Pathway to Active DNA Demethylation in Arabidopsis
Source: PubMed Central journal article supplement (PMC4619598; doi:10.1371/journal.pgen.1005559), 2015-10-22

# Figure S4

**A**

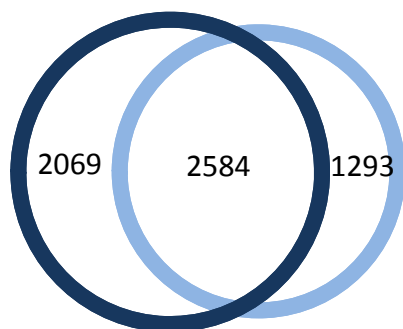

*met18-1* rep.1 N=4653  
*met18-2* rep.2, N=3884

**C**

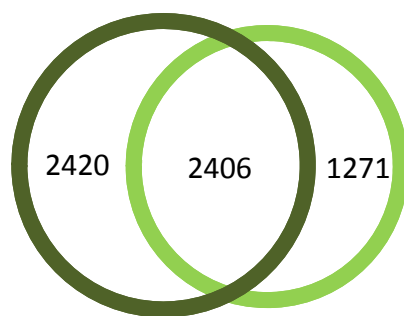

*met18-2* rep.1 N=4826  
*met18-2* rep.2 N=3687

**E**

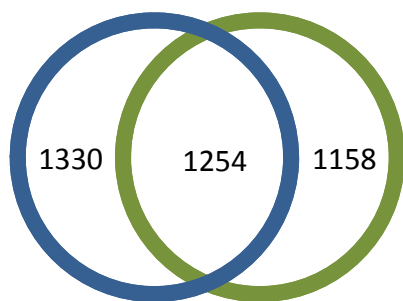

*met18-1* N=2584  
*met18-2* N=2406

**B**

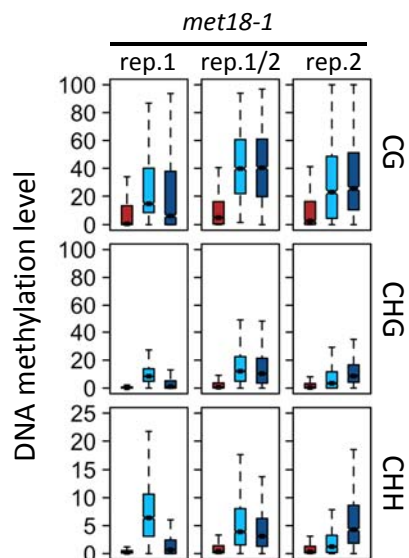

**D**

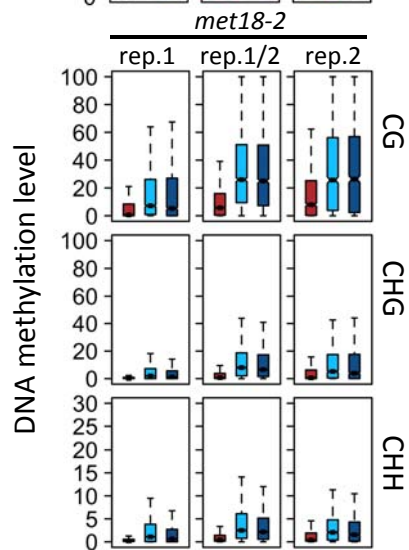

**F**

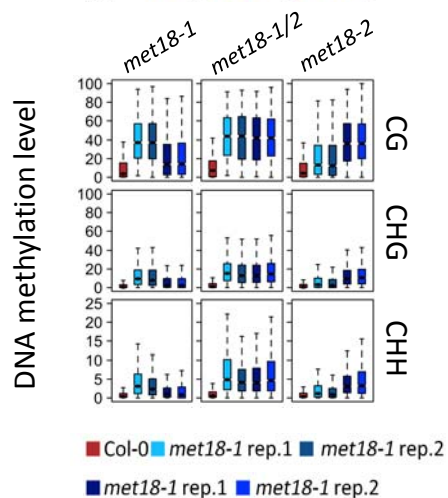

Supplement: pgen.1005559.s004.pdf [file pgen.1005559.s004.pdf]
