# Supplementary material for: MET18 Connects the Cytosolic Iron-Sulfur Cluster Assembly Pathway to Active DNA Demethylation in Arabidopsis
Source: PubMed Central journal article supplement (PMC4619598; doi:10.1371/journal.pgen.1005559), 2015-10-22

# Figure S7

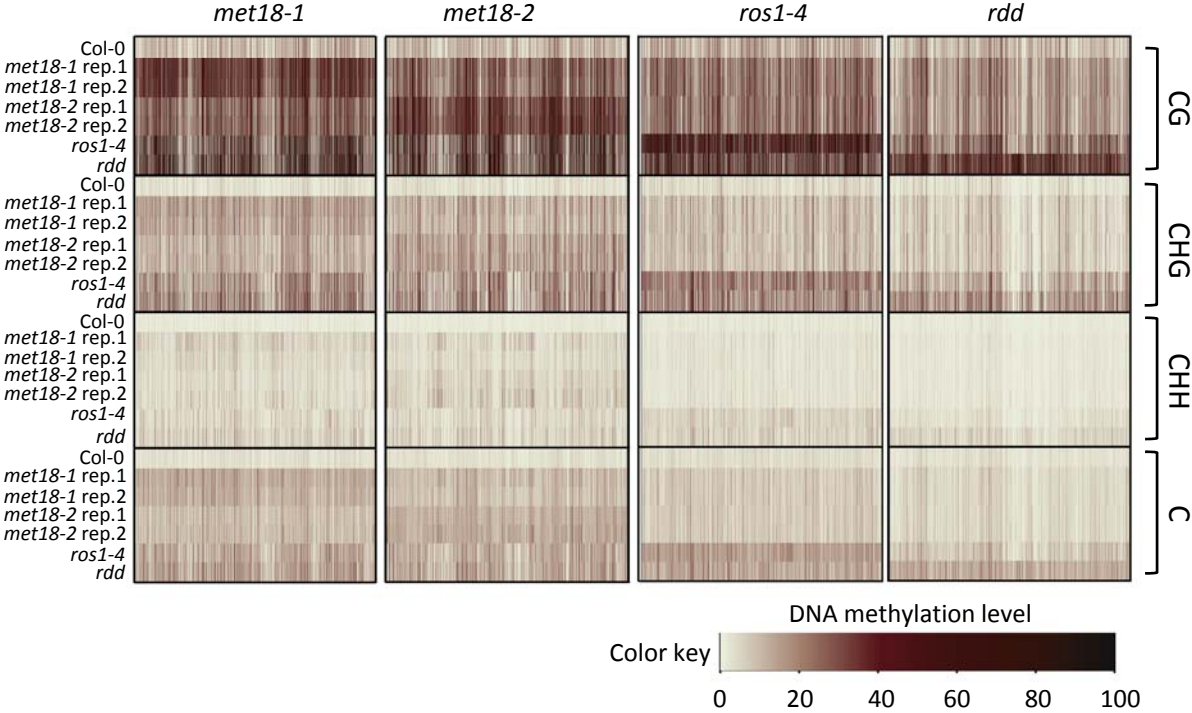

Supplement: pgen.1005559.s007.pdf [file pgen.1005559.s007.pdf]
